# Supplementary material
Source: publisher site journal article supplement (https://www.dovepress.com/article/605642)
Supplement: Supplementary file 1 [file 605642_Supplementary%20Table%20S1-S2.doc]

Supplementary Table S1 Baseline characteristics of included and excluded patients

| Characteristic | Included patients (n=652) | Excluded patients (n=516) | *P*-value |
| --- | --- | --- | --- |
| Age, years | 69(62,76) | 70(64,76) | 0.070 |
| Male, n (%) | 506(77.6) | 397(76.9) | 0.786 |
| BMI, kg/m² | 23.88(20.96,26.08) | 23.44(20.76,26.17) | 0.946 |
| Smoking index | 750(100,1590) | 600(200,1000) | 0.150 |
| Hypertension, n (%) | 301(46.2) | 237(45.9) | 0.936 |
| FEV₁ % predicted | 45.0(30.8,60) | 45.9(32.7,68) | 0.062 |

Abbreviations: BMI, body mass index; FEV₁, forced expiratory volume in 1 second.

Supplementary Table S2 Univariable analyses

| Variables | HR | 95%CI | *P*-value |
| --- | --- | --- | --- |
| Age | 1.045 | (1.019,1.071) | <0.001 |
| BMI | 0.870 | (0.824,0.920) | <0.001 |
| **Comorbidities** |  |  |  |
| CHD | 1.478 | (0.948,2.305) | 0.085 |
| Chronic atrial fibrillation | 1.311 | (0.481,3.570) | 0.597 |
| Diabetes | 1.019 | (0.602,1.725) | 0.945 |
| Cerebral infarction | 1.91 | (1.017,3.586) | 0.044 |
| Asthma | 2.542 | (1.111,5.816) | 0.027 |
| PTE | 2.403 | (1.381,4.178) | 0.002 |
| DVT | 1.348 | (0.624,2.913) | 0.448 |
| **Symptoms and Signs** | |  |  |
| Fever | 1.709 | (0.887,3.296) | 0.109 |
| Moist crackles | 1.735 | (1.152,2.614) | 0.008 |
| Edema in lower Extremities | 1.506 | (0.946,2.399) | 0.084 |
| **Echocardiographic Parameters** | | |  |
| TAPSE | 1.948 | (1.12,3.387) | 0.018 |
| RV hypertrophy | 1.806 | (0.789,4.132) | 0.162 |
| **Laboratory tests** | |  |  |
| WBC | 0.971 | (0.901,1.046) | 0.437 |
| PLT | 1 | (0.997,1.003) | 0.820 |
| D-dimer | 1 | (1,1) | 0.924 |
| TG | 0.580 | (0.366,0.921) | 0.010 |
| GLU | 0.919 | (0.810,1.042) | 0.155 |
| NT-proBNP>300pg/ml or BNP>100pg/ml, n (%) | 3.279 | (2.164,4.969) | <0.001 |
| PaO2 | 1.002 | (0.992,1.011) | 0.752 |
| PaCO2 | 1.008 | (0.993,1.024) | 0.305 |
| FEV1 | 0.981 | (0.671,1.434) | 0.922 |
| Increased RV afterload | 2.572 | (1.701,3.890) | <0.001 |

Abbreviations: BMI, body mass index; CHD, coronary heart disease; PTE, pulmonary thromboembolism; DVT, deep vein thrombosis; TAPSE, tricuspid annular plane systolic excursion; RV, right ventricle; WBC, white blood cells; HCT, hematocrit; PLT, platelet; TG, triglyceride; GLU, blood glucose; NT-proBNP, n-terminal pro-brain natriuretic peptide; BNP, brain natriuretic peptide; PaO2, partial pressure of oxygen; PaCO2, partial pressure of carbon dioxide; FEV1, forced expiratory volume in the first second.
